# Supplementary material for: RND3 Potentiates Proinflammatory Activation through NOTCH Signaling in Activated Macrophages
Source: Hindawi journal article supplement (doi:10.1155/2024/2264799), 2024-01-01
Supplement: f1 [file 2264799.f1.pdf]

# Supplementary figures

Full scans of each western blot, including the protein Ladder information and the corresponding control, are shown for every figure.

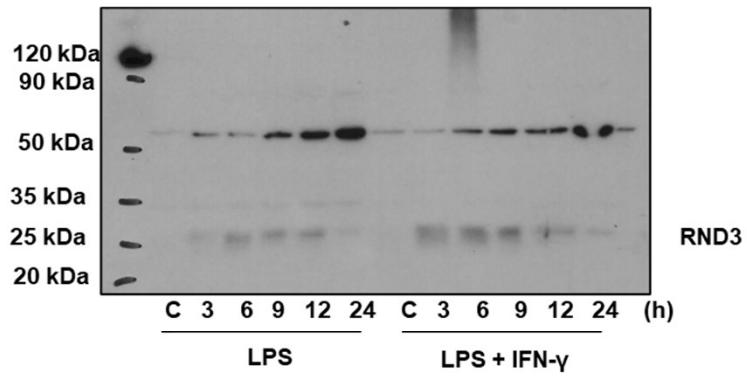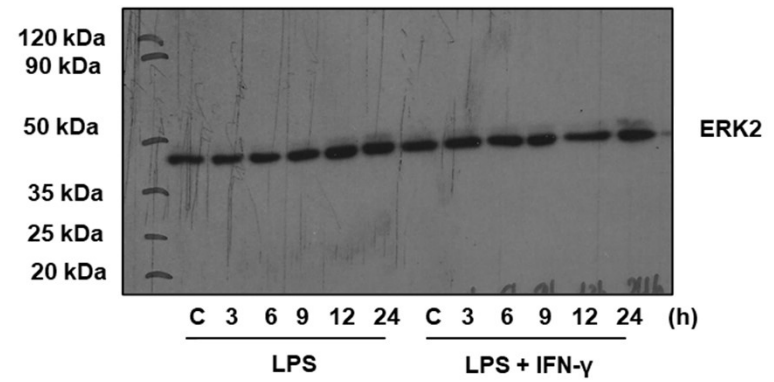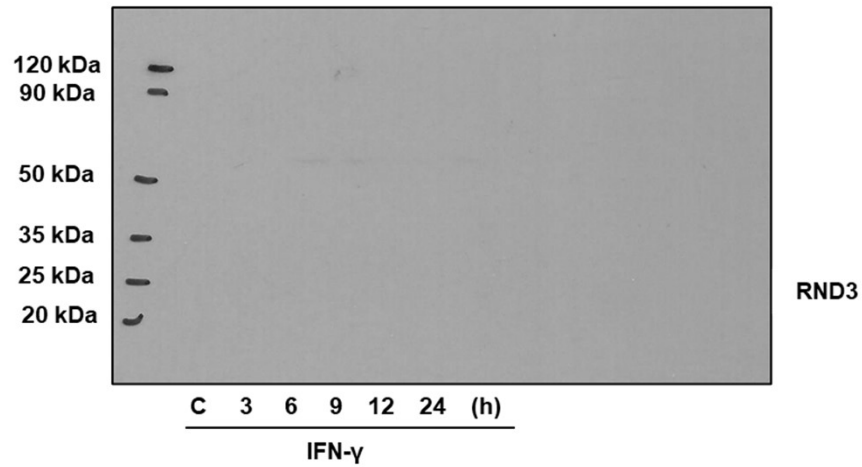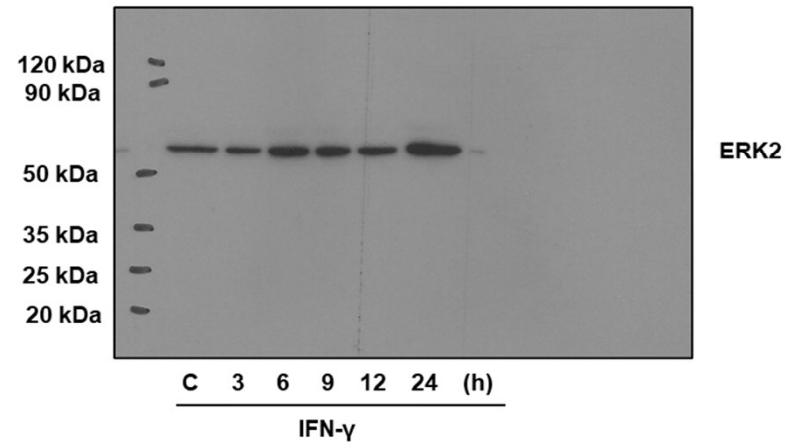

**Figure 1A**

# Figure 3A

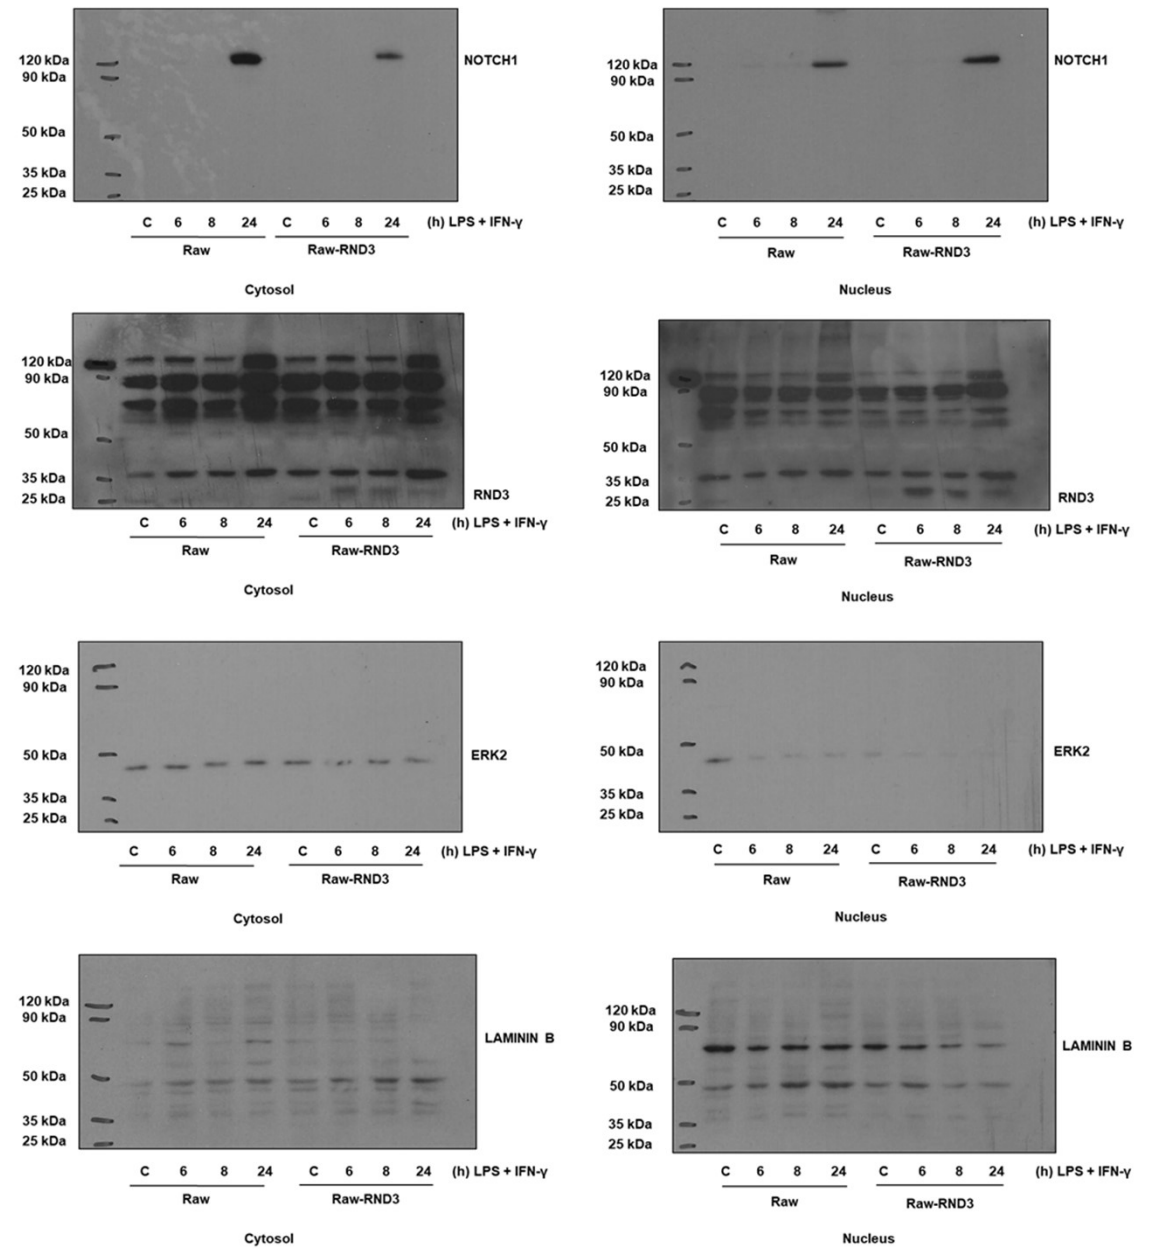

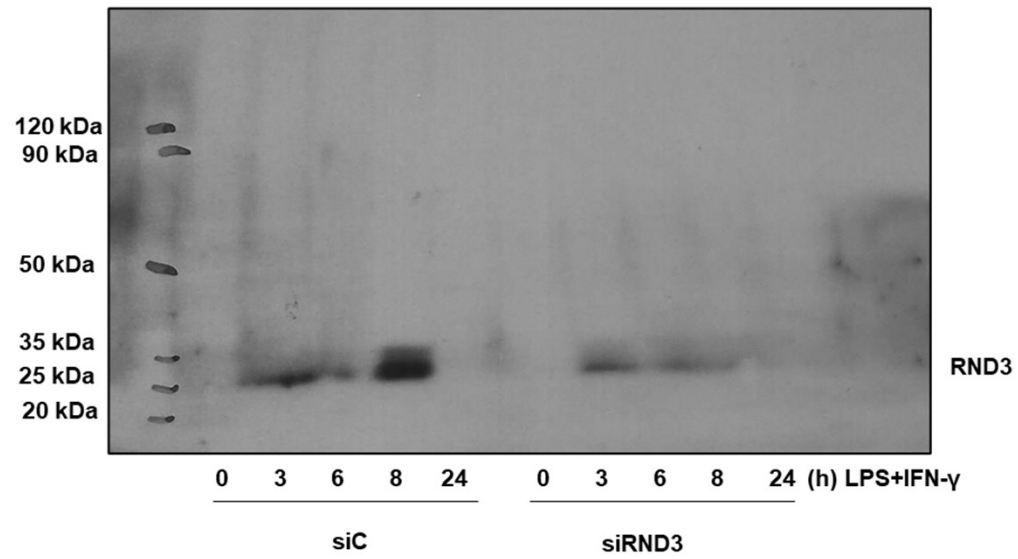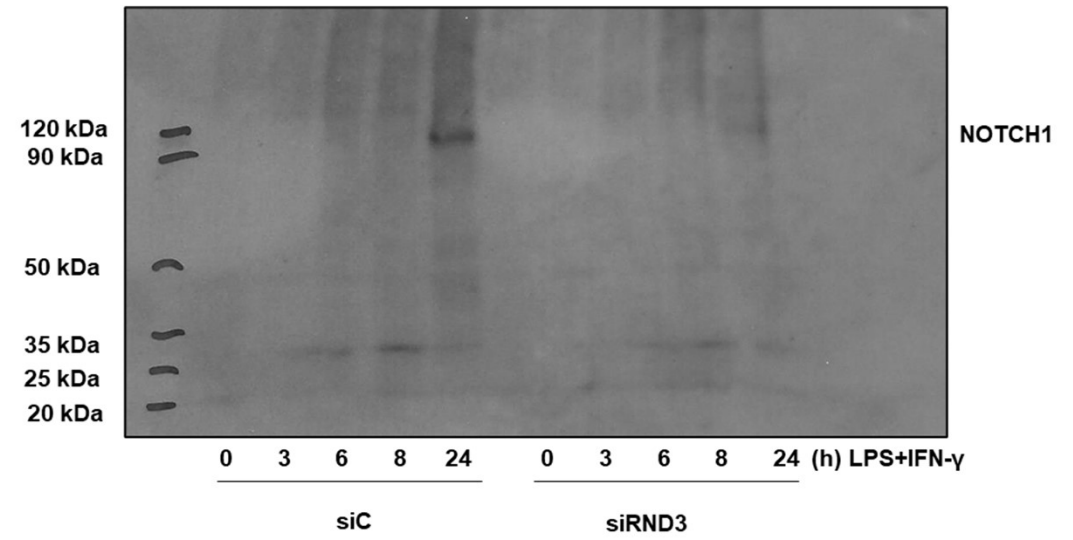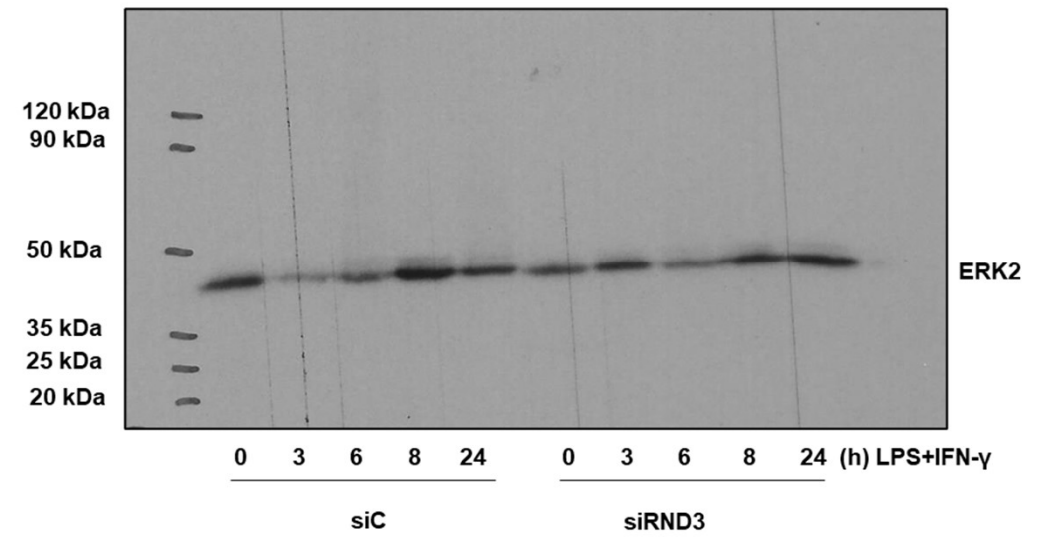

**Figure 3C**

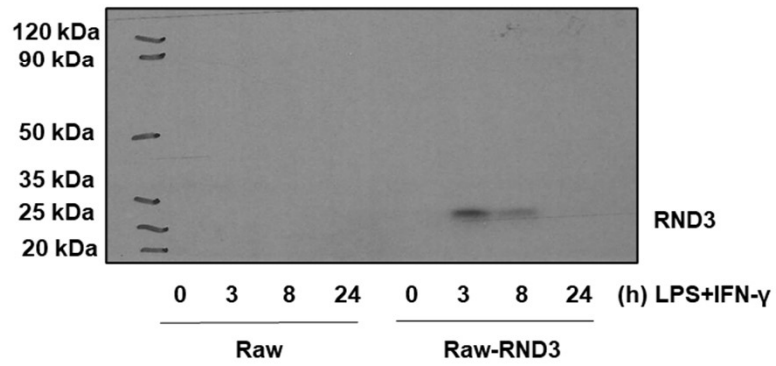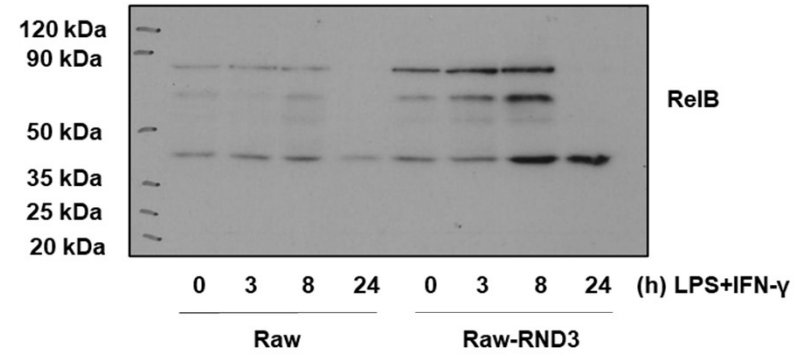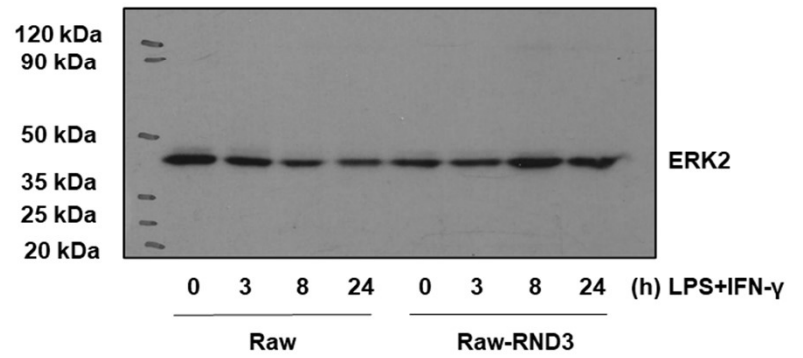

**Figure 4D Raw-RND3**

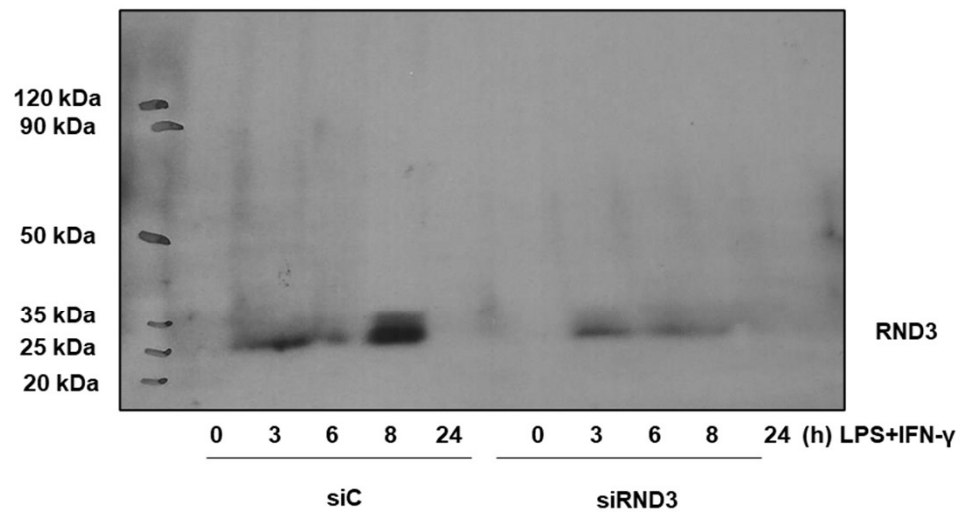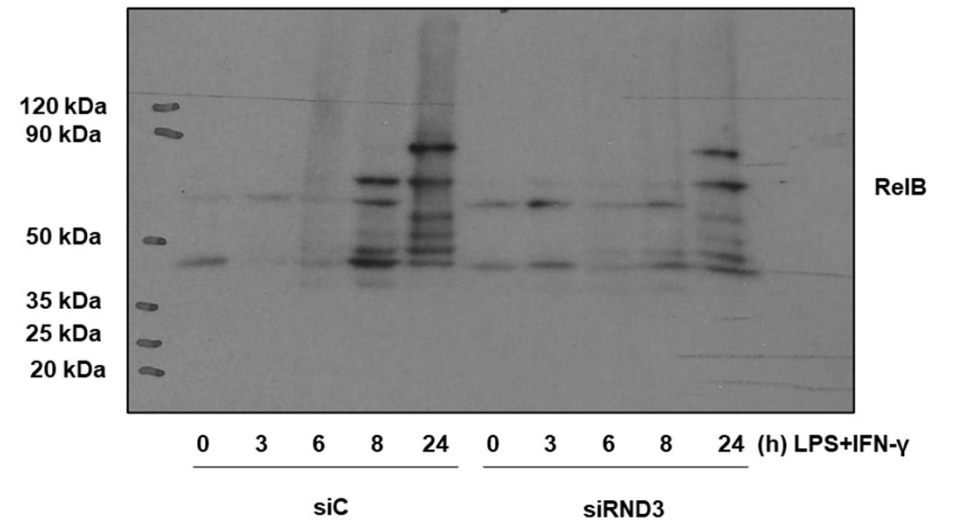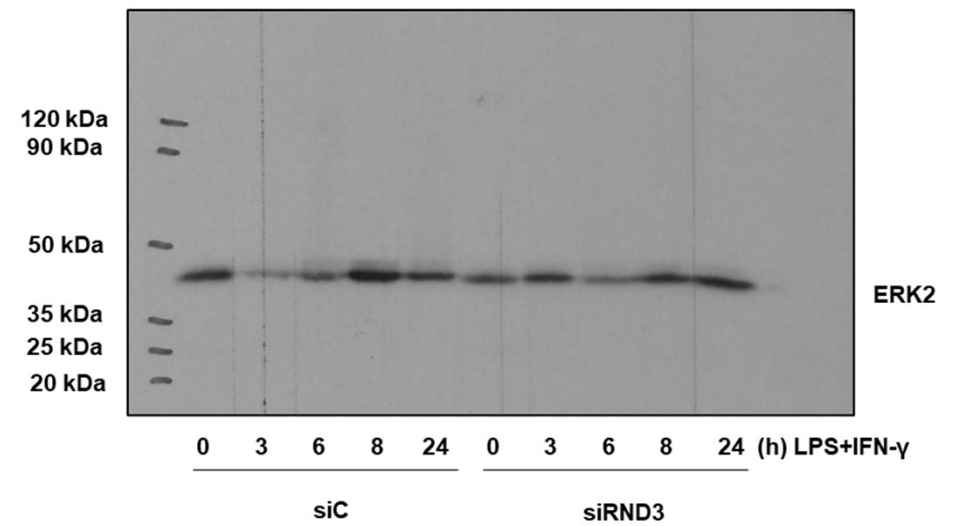

**Figure 4D siRND3**

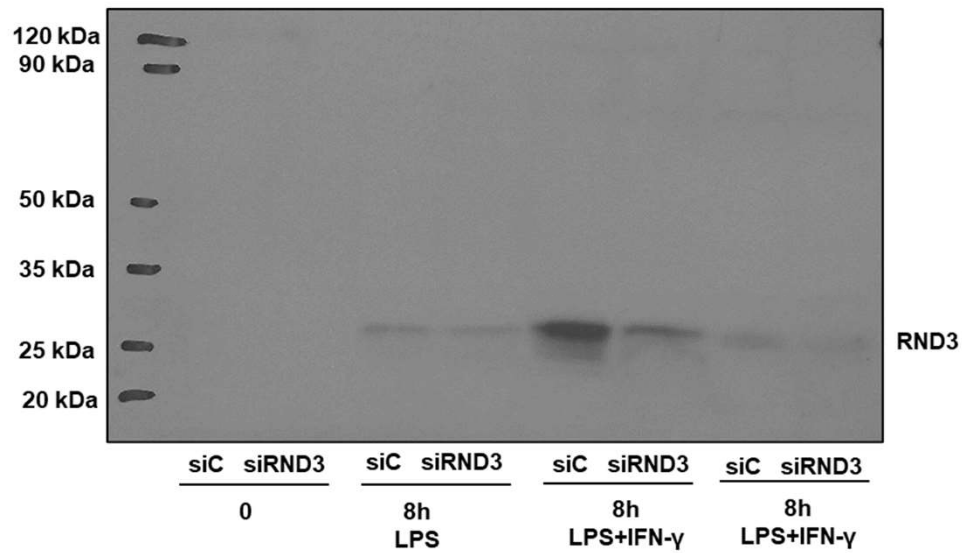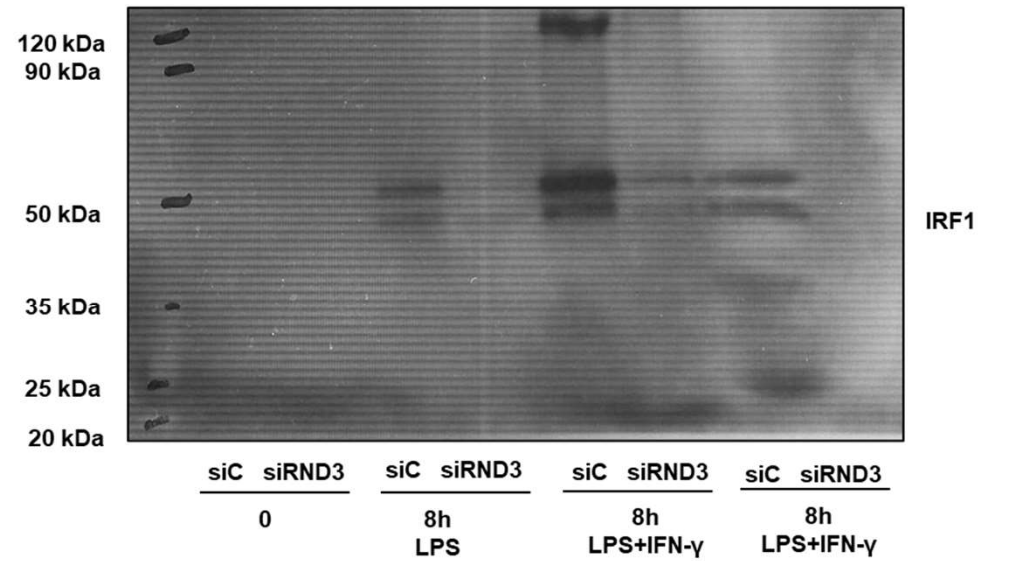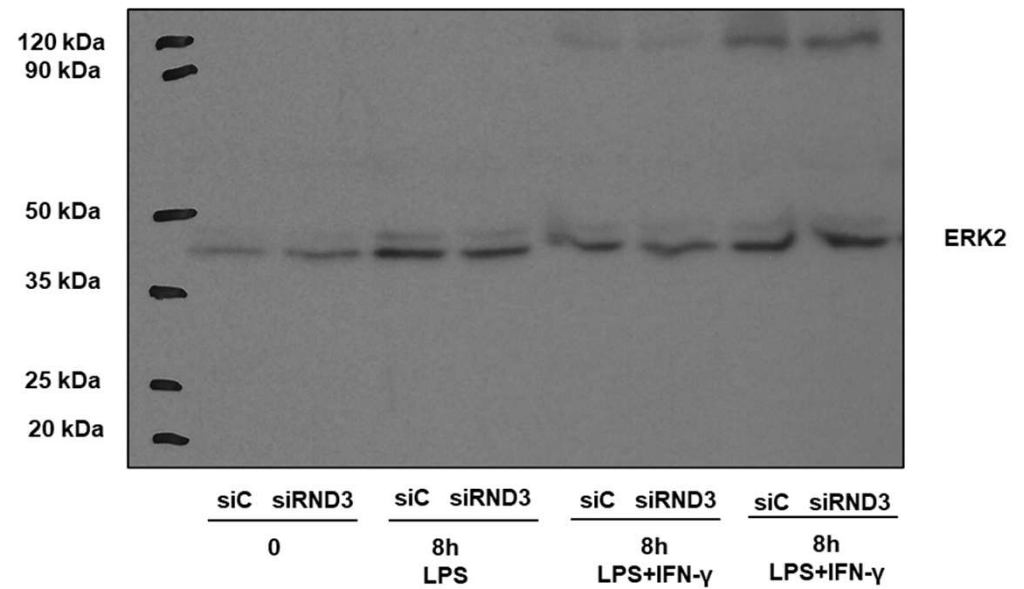

**Figure 5B**

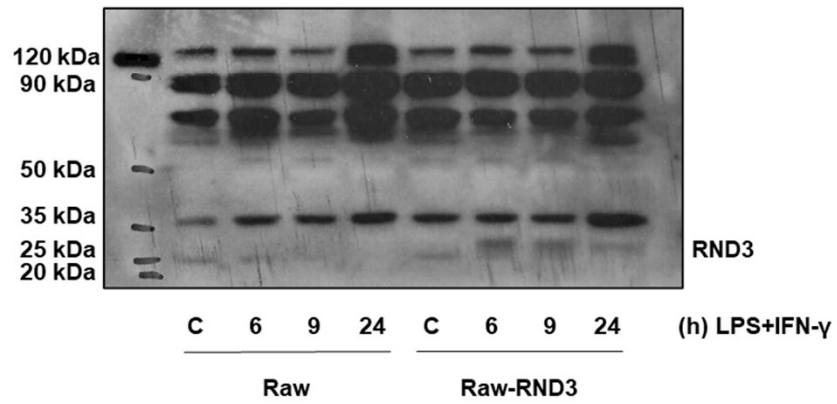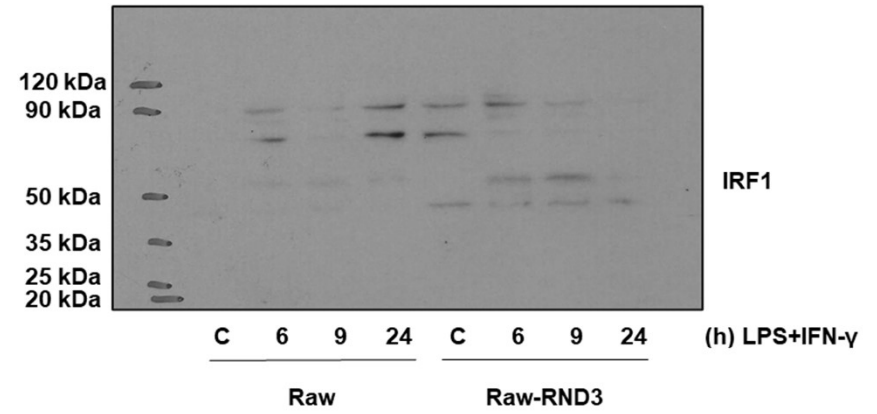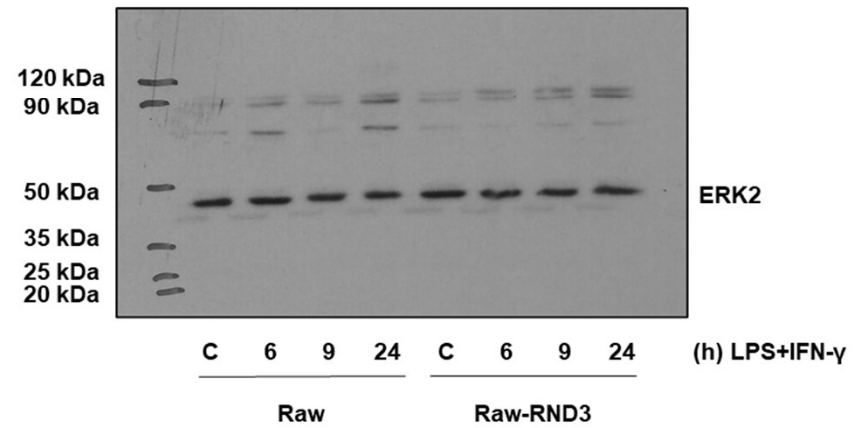

**Figure 5C**
